# Supplementary material
Source: PubMed Central journal article supplement (PMC2996834)

**Table S1**

| <b>Sequence</b>               | <b>Run 1</b> | <b>Run 2</b> | <b>Run 3</b> | <b>Run 4</b> |
|-------------------------------|--------------|--------------|--------------|--------------|
| K.ALEISHQWYQYK.R              | 1            |              |              |              |
| K.ATLQDLEQR.R                 | 1            |              | 1            |              |
| K.DNLQQISGR.I                 | 1            |              |              |              |
| K.EC#PIIGFR.Y                 |              |              |              | 1            |
| K.EEAEQVIGQVR.G               | 1            |              | 1            | 1            |
| K.EGNISDLQEK.V                |              |              | 1            | 1            |
| K.EIEVTVHGK.Q                 | 1            |              |              |              |
| K.ELEQFNSDIQK.L               | 1            |              |              |              |
| K.ELQDGIGQR.Q                 | 1            |              |              |              |
| K.EMNVLTEWLAATDTELTK.R        |              |              |              | 1            |
| K.FLSWITEAETTANVLQDASR.K      | 1            |              | 1            | 2            |
| K.GSWQPVGDLLIDSLQDHLEK.V      | 1            |              |              |              |
| K.ILLSWVR.Q                   | 1            | 1            | 1            | 1            |
| K.IQSDLTSHEISLEEMK.K          | 1            |              |              |              |
| K.LEM*PSSLLLEVPALADFNR.A      |              |              |              | 1            |
| K.LLAEELPLR.Q                 | 1            |              |              |              |
| K.LLDPEDVATTYPDK.K            | 1            |              |              |              |
| K.LLEPLEAEIQQGVNLK.E          | 1            |              |              | 1            |
| K.LLEQSIQSAQEIEK.S            |              | 1            | 1            | 1            |
| K.LLTETVNSVIAHAPPSAQEALK.K    | 1            |              |              |              |
| K.LSSLNQDLLSALK.N             | 1            |              |              | 1            |
| K.LSSQLVESCQK.L               | 1            |              |              |              |
| K.MTELYQSLADLNNVR.F           | 1            |              |              | 1            |
| K.NVLSEFQR.D                  | 1            |              |              |              |
| K.QLNETGGAVLVSAPIRPEEQDKLEK.K |              |              | 1            |              |
| K.SEAELFASR.L                 | 1            |              |              |              |
| K.SEVEMVIK.T                  | 1            |              |              | 1            |
| K.SLHLIQESLEFIDK.Q            | 1            |              | 1            |              |
| K.SVTELGESLK.M                | 1            | 1            |              |              |
| K.TAALQSATSMEK.V              | 2            |              | 1            | 1            |
| K.TDVNILQEK.L                 | 1            |              |              | 1            |
| K.TGIISLC#K.A                 |              |              | 1            |              |
| K.TIMAGLQQTNSEK.I             | 1            |              | 1            |              |
| K.TQSTTLSEPTAIK.S             | 1            |              |              |              |
| K.VDAAQMPQEAQK.I              | 2            |              | 1            | 1            |
| K.VLMDLQNQK.L                 | 1            |              | 1            |              |
| K.VLQEDLEQEQR.V               | 1            |              |              |              |
| K.VQEAVAQMDFQGEK.L            | 1            |              | 1            |              |
| K.VVEPQISELNR.R               | 1            | 1            | 1            |              |
| K.WLNEVELK.L                  |              |              | 1            |              |

**Table S1 (cont'd)**

| Sequence                      | Run 1 | Run 2 | Run 3 | Run 4 |
|-------------------------------|-------|-------|-------|-------|
| R.APGLSTTGASASQTVTLVTQSVVTK.E | 1     |       |       |       |
| R.AQGEISNDVEEVK.E             | 1     |       |       | 1     |
| R.DAELIAEAK.L                 |       |       | 1     |       |
| R.DYSADDTR.K                  | 1     |       |       |       |
| R.ELHEEAVR.K                  | 1     |       |       |       |
| R.IFLTEQPLEGLEK.L             | 1     | 1     |       | 1     |
| R.ILADLEEENR.N                | 1     |       | 1     | 1     |
| R.IQIQWDEVQEQLQNR.R           | 1     |       |       |       |
| R.LEPQSMVWLPVLR.V             |       |       | 1     |       |
| R.LGLLLHDSIQIPR.Q             |       |       | 1     |       |
| R.LLDLLEGLTGQK.L              | 1     |       | 1     | 1     |
| R.LLQQFPLDLEK.F               | 1     | 1     | 1     | 1     |
| R.LLQVAVEDR.V                 | 1     |       | 1     | 1     |
| R.LQELQEADELDK.L              | 1     |       | 1     | 1     |
| R.LSALQPQIEQLK.I              | 1     | 1     | 1     | 1     |
| R.MQILEDHMK.Q                 | 2     | 1     | 1     |       |
| R.QAPIGGDFPAVQK.Q             | 1     | 1     | 1     | 1     |
| R.QIESNFAQFR.R                | 1     |       |       |       |
| R.QITVDSELR.K                 | 1     |       |       |       |
| R.QLGEVASFGGSNIEPSVR.S        | 1     |       |       | 1     |
| R.QLLEQPQAEAK.V               | 1     |       | 1     | 1     |
| R.RPQLEELITAAQNLK.N           | 1     |       |       |       |
| R.SAQALVEQMANEGVNAESIR.Q      |       |       |       | 1     |
| R.SEAVLQSSEFAVYR.K            | 1     |       |       |       |
| R.SLEGSDEAPLLQR.R             | 1     |       | 1     |       |
| R.SPAQILISLESEER.G            | 1     |       |       |       |
| R.TLNATGEEIIQQSSK.T           | 1     |       | 1     | 1     |
| R.VLSQIDVAQK.K                | 1     |       | 1     | 1     |
| R.VSEQEAALETHR.L              | 2     |       | 1     |       |
| R.WIVLQDILLK.W                | 1     | 1     | 1     | 1     |
| R.WTEFC#QLLSER.V              |       | 1     | 1     | 1     |
| R.YQETMSSIR.T                 |       |       | 1     | 1     |

FIGURE S1

R18~L2~R21

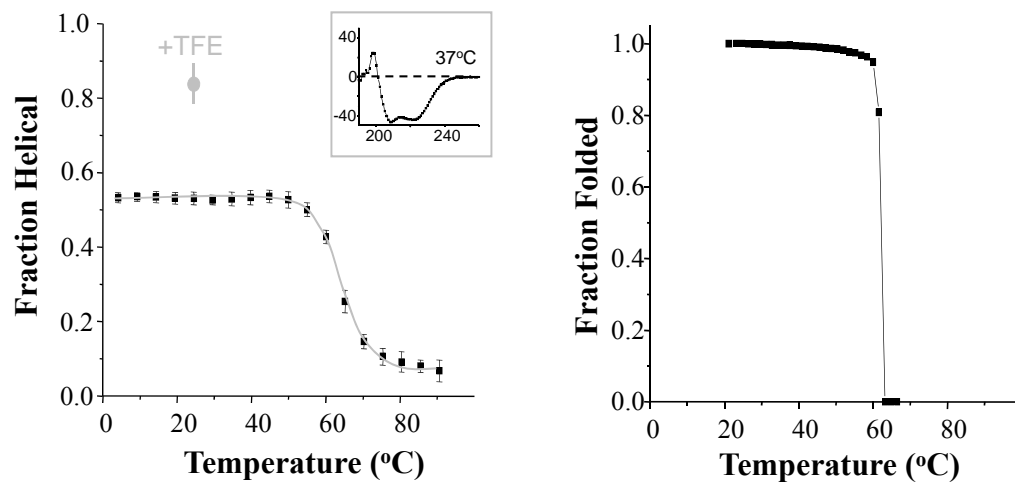

**FIGURE S2**

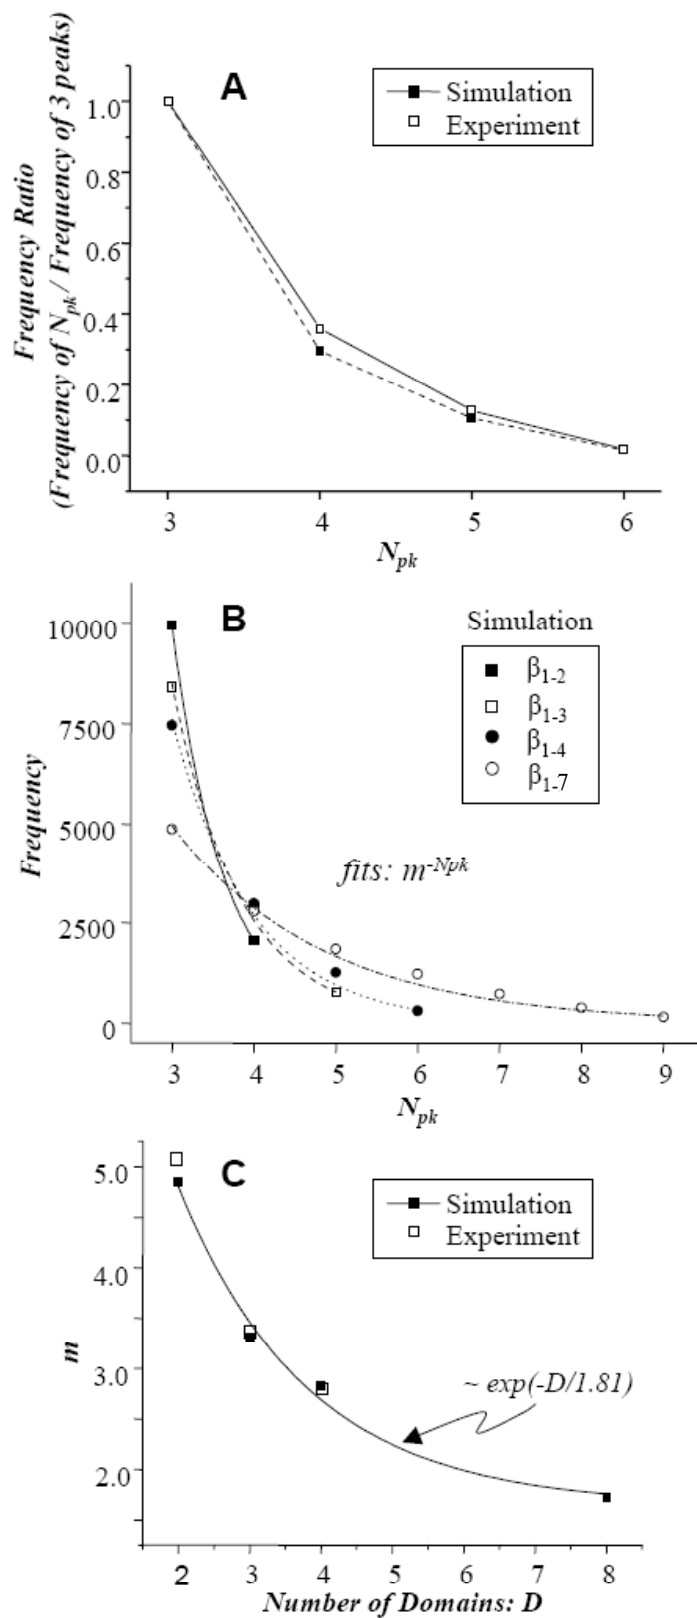

Supplement: NIHMS253973-supplement-Supp_Fig_s1-s2___Table_S1.pdf [file NIHMS253973-supplement-Supp_Fig_s1-s2___Table_S1.pdf]
